# Supplementary material for: Identification and Experimental Validation of LINC00582 Associated with B Cell Immune and Development of Pulpitis: Bioinformatics and In Vitro Analysis
Source: MDPI journal article supplement (doi:10.3390/diagnostics13101678), 2023-05-09
Supplement: s1 [file s1]

# Supplementary Materials: Identification and Experimental Validation of LINC00582 Associated with B Cell Immune and Development of Pulpitis: Bioinformatics and In Vitro Analysis

Wenting Gong <sup>1,2</sup>, Lilin Hong <sup>1,2,\*</sup> and Yi Qian <sup>1,2</sup>

**Table S1.** The primers used in this study.

| Gene name   | Forward primer (5'-3')  | Reverse primer (5'-3') |
|-------------|-------------------------|------------------------|
| LINC02618   | TGACTCCCCACCAAGAATCC    | GCAGATCTCTTTCGCCAGTG   |
| LINC02828   | CTAAGGATGGAGATGGGGCC    | CTCCAAGTTCCACCAGCTCT   |
| LINC02482   | CGGAATTGGTGGGTCTTGG     | TGAAGGTCCTGAGGCTGTTT   |
| LINC00582   | AGGCGGAAAGAACTACGTGA    | TCACACCCAGACTCTGCATT   |
| LINC01926   | CTGAAAGCCATCTCTTCGG     | TCTCAGCCCTCTACAATGCC   |
| LINC01094   | AGCCTCGGCTGTGTTGTAT     | AGGTTGACACATCTCGCCTG   |
| LINC02705   | TTGGTGTGCCCTGAAGAGAT    | GGCGTTCACATCATCTCCAC   |
| LINC01266   | TTGCTGCACCTCTCAACCTA    | ACACAGGGAGGGAACAACAA   |
| LINC00278   | CAGGACAACCTCAACCCGAG    | GAGGTCCTGTAGCACACTGT   |
| LINC01724   | CCTGCCCAGAGACTGTACAT    | AAACCTGGGCCAAGTTAACT   |
| LINC02561   | GAGGGCATCAAAGAAGTGGA    | TCCAGGGCTCAATCTCTGAC   |
| LINC01857   | CTCCACTGCGCTTTGTCCAT    | GAGGCTTTGAGGATGGGGAC   |
| ANKRD44-IT1 | AAGGTGACATGAGGGGACAG    | AAACACCCCTCGATTGCTTG   |
| IL10RB-DT   | AGGCCACCAAGAAGAGCTAG    | CATTGGAGAGCGTACGTGTG   |
| LINC02148   | GGTGGGTATGGGAGACAGAG    | AATCTGGTTCTCTCTGGGC    |
| LINC02123   | CAGAGAACTTTGGCTGCACA    | GCCTCCCCAGATTCCAAGTA   |
| LINC01665   | TGAAGCTCTGCCTCCTGAAG    | TTCATTCTGCAGCCAAACCC   |
| IL-6        | ATGCTTCCAATCTGGATTCAATG | CAGCTCTGGCTTGTTCCTCACT |
| CD79B       | CAGAGCCCACGTTTCATAGC    | TCTCGTCCATCTCCTGCTTC   |
| IL-8        | CCAGGAAGAAACCACCGGA     | GAAATCAGGAAGGCTGCCAAG  |
| GAPDH       | CCAAGGAGTAAGACCCCTGG    | AGGGGAGATTCACTGTGGTG   |
